# Age-associated Changes in Cardiac Gene Expression after Preconditioning

Lixin Liu, M.D., Ph.D.,\* Jiang Zhu, M.D.,† Peter S. A. Glass, M.B., Ch.B.,‡ Peter R. Brink, Ph.D.,§  
Ira J. Rampil, M.D., M.S.,|| Mario J. Rebecchi, Ph.D.#

**Background:** Cardiac protection afforded by ischemic preconditioning (IPC) and anesthetic preconditioning (APC) are significantly reduced in the senescent myocardium. The authors hypothesized that age would differentially modulate gene expression induced by IPC and APC *in vivo*.

**Methods:** Affymetrix RAT EXON ST 1.0 gene chips (Affymetrix, Santa Clara, CA) were used to explore the transcriptional response to IPC and APC in Fisher 344 male rats (young, 3–5 months, and old, 20–24 months, respectively). Both cohorts, young and old, were divided into three groups: (1) sham control, (2) IPC, and (3) APC. After a total of 90 min, the heart was removed, and the total RNA and protein were extracted.

**Results:** Thirty-one transcripts were increased in the young animals subjected to IPC, particularly transcriptional regulators (Atf3, Egr-1, Btg2, Egr2), cytokines (interleukin 6, CSF1, Myd88), chemokines (Cxc10, Ccl2, Ccl7), regulators of growth and inflammation (Reg3g, Hamp), remodeling and cell adhesion migration (Cyr61, Tfp12, Timp1), regulators of apoptosis/cell death (Birc3, Arntl, Hamp, Phlda1), and cell cycle control/DNA repairs (Rrad, Gadd45b, Gadd45g). In contrast, only one transcript increased (Atf3) in the old animals subjected to IPC. No changes in gene expression were found in the young or the old animals subjected to APC.

**Conclusions:** Early-phase IPC and APC induced different genomic responses. The absence of detectable changes associated with early-phase APC suggests a posttranscriptional or posttranslational mechanism. The absence of a genomic response in the senescent myocardium (except for IPC-induced Atf3) could underlie the failure of IPC to provide any cardiac protective benefit to older animals.

DESPITE reduced mortality rates during the past decade, ischemic heart disease remains a leading cause of death and disability. It is well known that cardiovascular morbidity and mortality increase with age and that cardiovascular diseases are the major cause of death in the population older than 65 years.<sup>1</sup> Clearly, improving our knowledge of ischemic injury and cardioprotective therapies in the senescent myocardium is of paramount importance.

Structural changes (thickening of the left ventricular wall decreases in the number of myocytes, and left ventricle cavity size) and diastolic dysfunction are the most prominent signs of cardiac aging.<sup>2</sup> Biochemical

changes in aging hearts include decreased rates of calcium sequestration, accumulation of collagen, enhanced production of stress-related substances (e.g., atrial natriuretic peptide and opioids), increased expression of angiotensin II receptors, and desensitization of cardiac  $\beta$ -adrenergic receptors.<sup>3</sup> These structural and biochemical changes could have major implications in the age-related decrease in cardiac tolerance to ischemia. Old hearts have demonstrated worsening of myocardial stunning, have decreased recoveries in hemodynamic and high-energy phosphates, and have greater overall tissue damage after ischemic insult.<sup>4</sup> However, the regulatory mechanisms underlying these changes are not fully understood.

Ischemic preconditioning (IPC) and anesthetic preconditioning (APC) both represent powerful means of attaining myocardial protection against prolonged ischemia.<sup>5,6</sup> The preconditioning stimuli exhibit “memory” characterized by early and late windows of protection. The classic early memory of ischemic preconditioning lasts 1–2 h in anesthetized animals.<sup>7,8</sup> However, the preconditioning stimulus further initiates and triggers a second, longer-lasting genomic response involving increased *de novo* protein synthesis of the translated gene products. This late preconditioning, or second window, is observed 12–24 h after the initial transient ischemic event and lasts for up to 72 h.<sup>9</sup>

In previous studies, we and others have shown that the cardiac protection afforded by IPC or APC is absent in the senescent rat myocardium.<sup>10,11</sup> Previous work has also shown that gene expression is altered in the senescent myocardium following myocardial ischemia–reperfusion after 24 h.<sup>12</sup> Whether this is true of early-phase IPC or APC has not been examined. To our knowledge, no previous study has examined early-phase preconditioning in young and senescent myocardium and compared its effects on gene expression *in vivo*. We hypothesized that (1) early-phase IPC and APC would affect myocardial gene expression patterns differently in young compared with older animals, and (2) IPC and APC in animals of similar age would induce expression of a common set of preconditioning genes. To test these ideas, microarrays analysis was used to measure genome-wide changes in myocardium messenger RNA (mRNA) levels after IPC and APC in young and old animals *in vivo*.

## Materials and Methods

All experimental procedures and protocols used in this investigation were reviewed and approved by the Ani-

\* Clinical Assistant Professor, † Postdoctoral Fellow, ‡ Professor and Chairman, # Associate Professor, Department of Anesthesiology, § Professor and Chairman, Physiology and Biophysics, || Professor, Departments of Anesthesiology and Neurological Surgery, Stony Brook University School of Medicine.

Received from the Department of Anesthesiology, Stony Brook University School of Medicine, Stony Brook, New York. Submitted for publication April 17, 2009. Accepted for publication August 4, 2009. Supported by Foundation for Anesthesia Education and Research grant—Research Starter Grant (RSG-02/15/07, Rochester, Minnesota).

Address correspondence to Dr. Liu: Department of Anesthesiology, Stony Brook University School of Medicine, HSC L4 060, Stony Brook, New York 11794. lixliu@notes.cc.sunysb.edu. Information on purchasing reprints may be found at www.anesthesiology.org or on the masthead page at the beginning of this issue. ANESTHESIOLOGY's articles are made freely accessible to all readers, for personal use only, 6 months from the cover date of the issue.

**Fig. 1. Schematic illustration of the experimental protocol.** APC = anesthetic preconditioning; IPC = ischemic preconditioning; MAC = minimum alveolar concentration.

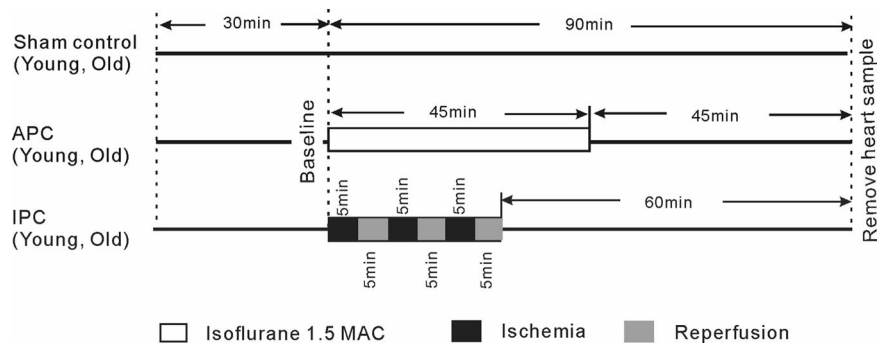

mal Care and Use Committee of SUNY Stony Brook, Stony Brook, New York. Furthermore, all procedures conformed to the Guiding Principles in the Care and Use of Animals of the American Physiologic Society and were in accordance with the *Guide for the Care and Use of Laboratory Animals*.

#### General Preparation

Young (3- to 5-month, 300- to 400-g) and senescent (20- to 24-month, 350- to 450-g) male F344 rats were anesthetized with intraperitoneal sodium thiobarbital (100–150 mg/kg). Once the animal was anesthetized, a heparin-filled (10 units/ml) catheter was inserted into the right jugular vein for fluid and drug administration. The right carotid artery was then cannulated to measure arterial blood pressure, and a tracheotomy was performed. Animals were ventilated on a Harvard Apparatus model 638 rat ventilator (Harvard Apparatus, Holliston, MA) using an air-and-oxygen mixture (50%/50%). A positive end-expiratory pressure of 5 cm H<sub>2</sub>O was implemented to minimize the development of atelectasis. Baselines of systemic hemodynamics were recorded after instrumentation was completed. Arterial blood gas tension and acid-base status were monitored at regular intervals and maintained within a normal physiologic range: pH, 7.35–7.45; arterial carbon dioxide tension, 25–40 mmHg; and arterial oxygen tension, 90–150 mmHg. Finally, a left thoracotomy was performed in the fifth intercostal space, and the pericardium was opened. A 6-0 Prolene suture was placed around the proximal left anterior descending coronary artery and vein in the area immediately below the left atrial appendage. The ends of the suture were threaded through a propylene tube to form a snare. Coronary artery occlusion was produced by clamping the snare onto the epicardial surface of the heart with a hemostat and was confirmed by the appearance of epicardial cyanosis. Reperfusion was achieved by loosening the snare and was verified by observing an epicardial hyperemic response. Isoflurane was delivered by calibrated isoflurane vaporizer (A.M. Bickford Inc., Wales Center, NY), and end-tidal concentrations of isoflurane, carbon dioxide, and inspired oxygen concentrations were measured at the tip of the tracheotomy tube using a Poet IQ2 (Criticare Systems Inc., Waukesha,

WI) infrared gas analyzer throughout the experiment. Body temperature was maintained at  $37^{\circ} \pm 0.2^{\circ}\text{C}$  using a heating pad and radiant warmer. Heart rate and mean blood pressure data were continuously recorded throughout the experiment. At the end of the protocol, the animal was killed with an overdose of sodium thiobarbital.

#### Protocol for Experiments

The current investigation protocol is illustrated in figure 1. Both cohorts, young and old, were divided into three groups: sham control (SC), IPC, and APC. Therefore, we had six groups ( $n = 5$  per group): (1) young SC (YSC) group; (2) young IPC (YIPC) group—three cycles of ischemia and reperfusion, 5 min each, followed by 60 min of reperfusion; (3) young APC (YAPC) group—45 min of 1.5 minimum alveolar concentration isoflurane followed by 45-min washout; (4) old SC (OSC) group; (5) old IPC (OIPC) group—three cycles of ischemia and reperfusion, 5 min each, followed by 60 min of reperfusion; and (6) old APC (OAPC) group—45 min of 1.5 minimum alveolar concentration isoflurane followed by 45-min washout. In each case, rat left ventricular heart samples were collected at the end of experiment, flash frozen in liquid nitrogen and stored at  $-80^{\circ}\text{C}$ .

#### RNA Isolation, cDNA Preparation, and Hybridization with Affymetrix Gene Chips

Frozen 30-mg portions of the left ventricular myocardium were homogenized with a Polytron (Kinematica, Bohemia, NY), and total RNA was prepared with RNeasy Fibrous Tissue Mini kit (Qiagen, Valencia, CA). Isolated RNA was flash frozen in aliquots and stored at  $-80^{\circ}\text{C}$  until analysis. The concentration of the purified RNA was measured by ultraviolet spectrophotometer using the ratio of A<sub>260</sub>/A<sub>280</sub> ( $> 1.8$ ) and the intactness of the 18S and 28S ribosomal subunits subjected to electrophoresis on an Agilent 2100 Bioanalyzer (Agilent Technologies Inc., Santa Clara, CA). Samples passing quality control were processed by the Microarray Core facility (Cold Spring Harbor Laboratory, Woodbury, NY). Sample quality was assessed by RNA Integrity Number or RIN score, and samples with an RIN of 7.5 or greater were passed; quantity was assessed by Nanodrop ND-1000 spectrophotometer (Nanodrop Technologies, Wilmington, DE).

**Table 1. Primers Used for Quantitative Real-time PCR**

| Gene Symbol   | mRNA Accession | Forward Primer        | Reverse Primer       |
|---------------|----------------|-----------------------|----------------------|
| Atf3          | NM_012912      | CCAGGTCTCTGCCTCAGAAG  | AAGGTGCTTGTCTGGATGG  |
| Egr1          | NM_012551      | CATGACAGCAACCTTTTCTCC | TTGGCTCTGAGATCTCCATC |
| Interleukin 6 | NM_012589      | TCTCTCCGCAAGAGACTTCC  | CCTCCGACTTGTGAAGTGGT |
| Ccl2          | NM_031530      | TGTTACAGTTGCTGCCTGT   | TGCTGCTGGTGATTCTCTTG |
| Pgk1          | NM_053291      | TAAAGTCAGCCATGTGAGCA  | ATGAATCCCAGTGCAGTAAA |

mRNA = messenger RNA; PCR = polymerase chain reaction.

Fifty nanograms of total RNA was amplified by Ribo-SPIA (single primer isothermal amplification), an isothermal complementary DNA (cDNA) amplification technique, using WT Ovation PICO kit, followed by strand conversion EXON module and FL module to label and fragment the product (NuGen, Technologies, Inc., San Carlos, CA). cDNA smear analysis for Quality Control was performed on select samples using Agilent 2100 Bioanalyzer RNA 6000 Nano Series II Chips (Agilent, Palo Alto, CA). Samples were then prepared for hybridization, hybridized, washed, and scanned according to the manufacturer's instructions on Rat Exon ST 1.0 GeneChips (Affymetrix, Santa Clara, CA). Affymetrix Quality Control metrics were used to qualify the resulting data.

#### Microarray Data Analysis

Affymetrix Rat Exon ST 1.0 microarray chips contain more than 4 million probe spots representing at least 4 replicates each of approximately 850,000 exon clusters, which is estimated to provide approximately 40 expressed sequence tag probes per gene. R 2.8.0\*\* and Bioconductor 2.3<sup>13</sup> are freely available public domain software packages that were used to analyze the microarray data. We used the "Core" Annotation files to group the exon probe levels into probable expression of 8608 curated genes. Individual microarray chips were scanned by the Affymetrix Gene Chip scanner 3000 7G and produced corresponding cel files. The cel files were aggregated in Bioconductor, then expression levels were normalized using the RMA algorithm,<sup>14</sup> and the quality of the hybridization and scanning was assessed using interchip variation with box plots. To reduce the multiple comparison problems, only the top 1,000 putative genes ranked for variance across the experimental groups were examined for differential expression (DE). DE was then assessed using the linear models for microarray data (LIMMA) algorithm.<sup>15</sup>

#### Real-time PCR

To confirm the gene expression patterns of microarray hybridization, reverse-transcription polymerase chain reaction (RT-PCR) was performed using the QuantiTect reverse-transcription kit (Qiagen) for multiple selected genes, in which the expression levels were significantly

altered ( $\geq 2.0$ -fold) by IPC determined by the microarray analysis. The forward and reverse sequences of the primers used are listed in table 1. For each gene-specific amplification, 100 ng of cDNA was used as a template for the QuantiTect SybrGreen Real Time PCR kit (Qiagen). RT-PCR quantification and determination of expression levels were performed on a Bio-Rad iQ5 Sequence Detector Real-Time PCR machine (Bio-Rad Technology, Beverly, MA). Amplification reactions were conducted with an initial step at 95°C for 15 min followed by 42 cycles with four-step cycling: 15 s, 95°C; 15 s, 54°C; 30 s, 72°C; and 15 s, 78°C (recording fluorescence). All PCR reactions were performed in triplicate, and Pgk1 was used as an internal reference control for each sample. Thermal melting analyses were performed for all products. In addition, the predicted sizes of PCR products were confirmed by agarose gel electrophoresis. Relative gene expression was calculated from the data using the  $2^{-\Delta\Delta C_T}$  method.<sup>16</sup>

#### Western Blotting Analysis

Myocardial left ventricular samples were homogenized using a Polytron homogenizer in ice-cold lysis buffer containing 20 mM Tris HCl, pH 7.4, 150 mM NaCl, 1 mM EDTA, 1% Nonidet P-40, 0.1% SDS, 2.5 mM sodium pyrophosphate, 1 mM Na<sub>3</sub>VO<sub>4</sub>, 1 mM NaF, 1 mM dithiothreitol, 1 mM PMSF (freshly prepared), and a complete mammalian proteinase inhibitor cocktail (one tablet per 10 ml; Sigma-Aldrich, St. Louis, MO). The homogenate was centrifuged at 13,000 g for 30 min at 4°C to isolate total protein. The clarified supernatant was used to quantify protein. Protein concentrations were determined using the BCA Protein Assay Kit (Bio-Rad, Hercules, CA). Equivalent amounts (30  $\mu$ g) of total proteins were mixed with 2X Laemmli buffer and heated at 95°C for 5 min before loading. Samples were separated at 100 V by 15% SDS-polyacrylamide gel electrophoresis and then transferred to polyvinylidene difluoride membrane using a semidry transblot apparatus (Bio-Rad). Membranes were then blocked with 5% nonfat dry milk in Tris buffered saline containing 0.1% Tween-20, and were then incubated with the primary antibody 1:1,000 dilution of rabbit polyclonal ATF3 antibody (Santa Cruz Biotechnology, Santa Cruz, CA) at 4°C overnight in 5% nonfat dry milk and 0.1% Tween-20 in Tris buffered saline. Bands were visualized with ECL (Amersham ECL Plus™ Western

\*\* <http://www.R-project.org>. Accessed October 20, 2008.

Blotting Detection Reagents; GE Healthcare, Buckinghamshire, United Kingdom). Equal loading of samples was confirmed by reprobing membranes with  $\beta$ -Actin antibody (1:2,000) (Santa Cruz Biotechnology) and by staining with Ponceau S. Quantitative analysis of the band densities was determined using NIH Image 1.6 quantification software (National Institutes of Health, Bethesda, MD) and normalized against background density for each gel.

### Statistical Analysis

Gene set enrichment analysis using the linear models for microarray data approach, part of the BioConductor version,<sup>15</sup> was used to assess the significance of the differentially expressed gene sets. The eBayes function was used in which the log<sub>2</sub>-fold change (M) is determined for each gene and an average expression level for that gene (A) across all arrays is calculated. A moderated *t* statistic (*t*) is generated that is the ratio of the M value to its SE. This has the same interpretation as an ordinary *t* statistic, except that the SEs have been reduced to a common value across genes. There was no filtering of the linear models for microarray data output for effect size. The *P* values obtained from the linear models for microarray data analysis of the DE genes were adjusted by the Benjamini–Hochberg method to control for false discovery rate (FDR)<sup>17</sup> at *P* < 0.1. This FDR adjustment has been found to be superior to the Bonferroni correction for multiple comparisons in the analysis of large sets of gene expression data. Here, the adjusted *P* < 0.1 represents the chances of type 1 errors in the identifications of the members of the DE gene sets. The power of the experimental randomized block design within each age group was based on previously determined variances in comparable experiments with approximately 8,000 genes.<sup>18</sup> The calculations predicted detection limits of 45% change of transcript levels with greater than 80% power (allowing for an FDR of 10%).<sup>19</sup> Western blotting and hemodynamic data were analyzed using the Student *t* test, and paired *t* test with Bonferroni correction, respectively.

To identify functional gene clusters that characterize IPC-induced gene expression, the DE genes were filtered for an FDR of 10% and were entered into Ingenuity Pathway Analysis (IPA) software (Ingenuity Systems, Mountain View, CA), a Web-based program that comprises a large, well-curated knowledge base consisting of biologic and chemical information extracted from the literature. The DE genes were then evaluated as focus genes, defined as those having direct or indirect interactions with other genes in the IPA database. Using the network generation algorithm, connection specificity for each focus gene was evaluated. Each nascent network, containing a maximum of 35 genes, was constructed, beginning with the gene with highest specific connectivity score. This process was repeated for the remaining genes to construct additional networks. In this process,

**Table 2. Systemic Hemodynamics**

|                       | Group | No. | Baseline | Preconditioning | Memory   |
|-----------------------|-------|-----|----------|-----------------|----------|
| HR, min <sup>-1</sup> | YSC   | 5   | 364 ± 11 | 375 ± 15        | 382 ± 12 |
|                       | YIPC  | 5   | 379 ± 7  | 386 ± 17        | 368 ± 12 |
|                       | YAPC  | 5   | 372 ± 13 | 311 ± 11*       | 365 ± 9  |
|                       | OSC   | 5   | 352 ± 14 | 370 ± 17        | 362 ± 22 |
|                       | OIPC  | 5   | 341 ± 8  | 355 ± 14        | 361 ± 11 |
| MAP, mmHg             | OAPC  | 5   | 339 ± 12 | 268 ± 17*       | 341 ± 16 |
|                       | YSC   | 5   | 141 ± 16 | 139 ± 10        | 134 ± 5  |
|                       | YIPC  | 5   | 139 ± 11 | 135 ± 11        | 136 ± 11 |
|                       | YAPC  | 5   | 150 ± 12 | 101 ± 7*        | 129 ± 12 |
|                       | OSC   | 5   | 136 ± 16 | 126 ± 24        | 112 ± 25 |
|                       | OIPC  | 5   | 138 ± 8  | 130 ± 5         | 110 ± 12 |
|                       | OAPC  | 5   | 118 ± 26 | 82 ± 23*        | 102 ± 11 |

Values are mean ± SEM.

\* *P* < 0.05 compared with control baseline value.

APC = anesthetic preconditioning; HR = heart rate; IPC = ischemic preconditioning; MAP = mean arterial pressure; O = old; SC = sham control; Y = young.

the numbers of focus genes were reduced as a result of their inclusion in previously constructed networks. Genes from the global IPA network, not in the initial group, but with significant specific connectivity to the growing network, were included. Small networks were merged using linker genes and grown using neighborhood genes, optimizing edges as the networks were merged and grown. IPA networks were ranked by *p* score based on inclusion of as many of the inputted focus genes as possible and identifying the most highly connected networks. The local network *p* scores were derived from *P* values that describe the probability of finding *f* or greater focus molecules in a set of *n* genes randomly selected from the global network in the IPA database, and were calculated using Fisher exact test. The network *p* score is the  $-\log_{10}$  of the *P* value, so that a *p* score of 6 represents a 1 in 10<sup>6</sup> chance of obtaining at least the same number of focus genes from random assignments from the IPA database to the network.

## Results

### Systemic Hemodynamics

No differences in the baseline hemodynamics were observed among the three groups (APC, IPC, and control; table 2), and no differences were observed in mean arterial blood pressure between the young and old isoflurane groups. Isoflurane, however, significantly decreased (*P* < 0.05) the mean arterial blood pressure and heart rate (*P* < 0.05) in the young and old isoflurane groups when compared with their respective control groups. There were no differences in mean arterial blood pressures and heart rates during the memory period (washout) in the young and old isoflurane groups when compared with their respective control groups. There were no differences in the

**Table 3. Transcript Changes in Young Animals Subjected to Ischemic Preconditioning as Compared with Sham Controls**

| Gene Symbol | Function                                                                                                      | Classification                                   | Fold Change | Adjusted <i>P</i> < Value |
|-------------|---------------------------------------------------------------------------------------------------------------|--------------------------------------------------|-------------|---------------------------|
| Phlda1      | Negative regulator of apoptosis; induced by ER stress, Akt activation                                         | Proline-histidine-rich nuclear protein           | 2.0         | 0.011                     |
| Egr1        | Early response positive transcriptional regulator activated by p38Mapk and Erk pathways                       | Transcription factor                             | 3.6         | 0.011                     |
| Atf3        | Induced by stress and promotes cell survival, has positive and negative transcriptional regulatory properties | Transcription factor                             | 5.8         | 0.011                     |
| Btg2        | Negative regulator apoptosis, regulates genes controlled by Esr1                                              | Transcription factor                             | 2.8         | 0.012                     |
| IL6         | Cardioprotective cytokine produced by myocardium in response to ischemia                                      | Cytokine                                         | 3.7         | 0.016                     |
| Cyr61       | Facilitates endothelial cell adhesion, positive regulator of neovascularization                               | Secreted, cysteine-rich, heparin-binding protein | 2.5         | 0.016                     |
| Hamp        | Cellular iron homeostasis                                                                                     |                                                  | 2.0         | 0.016                     |
| Hspb1       | Stress induced under p53 control                                                                              | Heat shock protein                               | 1.8         | 0.016                     |
| Arntl       | Transcription regulator of circadian rhythm-associated genes                                                  | Transcription factor                             | 2.3         | 0.016                     |
| Rrad        | GTPase, calmodulin binding, nucleotide binding                                                                | GTP-binding protein                              | 2.3         | 0.027                     |
| Reg3g       | Stress protein                                                                                                | Lectin                                           | 2.8         | 0.027                     |
| Myd88       | Adapter protein involved in the Toll-like receptor and interleukin 1 receptor signaling pathway               | Adapter protein                                  | 1.9         | 0.032                     |
| Zfp36       | Regulates response to growth factors                                                                          | Zinc finger protein                              | 1.8         | 0.033                     |
| Timp1       | Inhibitor of the matrix metalloproteinases                                                                    | Metalloproteinase inhibitor                      | 1.8         | 0.033                     |
| Tfpi2       | Regulates plasmin-mediated matrix remodeling                                                                  | Protease inhibitor                               | 2.0         | 0.044                     |
| Gadd45b     | Stress-induced negative regulator of apoptosis                                                                |                                                  | 1.7         | 0.044                     |
| Cxcl10      | Angiostatic and antifibrotic chemokine induced by myocardial infarction                                       | Chemokine                                        | 3.4         | 0.044                     |
| Rnd1        | Rho GTPase, regulates the actin cytoskeleton                                                                  | GTPase                                           | 2.6         | 0.044                     |
| Egr2        | Zinc binding, transcription factor activity inducible by ischemia                                             | Transcription factor                             | 2.3         | 0.048                     |
| Gadd45g     | Stress-induced regulator DNA repair pathway                                                                   |                                                  | 2.0         | 0.062                     |
| Ccl7        | Induced by ischemia, regulates cardiac remodeling                                                             | Chemokine                                        | 2.4         | 0.062                     |
| Ccl2        | Induced by ischemic injury, regulates cardiac remodeling                                                      | Chemokine                                        | 2.8         | 0.073                     |
| Csf1        | Induced by myocardial injury, regulates cardiac remodeling                                                    | Cytokine                                         | 1.9         | 0.076                     |
| Ier3        | Protects against Fas- or TNF- $\alpha$ -induced apoptosis                                                     |                                                  | 1.7         | 0.080                     |
| Has1        | Role in hyaluronan/hyaluronic acid synthesis, tissue repair                                                   | Synthase                                         | 1.8         | 0.081                     |
| Osmr        | Receptor for oncostatin M, which is related to Il6                                                            | Cytokine coreceptor                              | 1.7         | 0.085                     |
| Serpine1    | Induced by ischemia, prevents fibrinolysis                                                                    |                                                  | 1.9         | 0.085                     |
| Birc3       | Suppress apoptosis induced by TNF                                                                             |                                                  | 2.3         | 0.085                     |
| Cxcl1       | Regulates neovascularization of ischemic myocardial tissue                                                    | Chemokine                                        | 2.6         | 0.085                     |
| Lmcd1       | Transcription regulator                                                                                       | Transcription factor                             | 1.7         | 0.085                     |
| Ugdh        | Biosynthesis of glycosaminoglycans                                                                            | Dehydrogenase                                    | 1.9         | 0.091                     |

Microarray results obtained from the myocardial tissue of young animals subjected to ischemic preconditioning were compared with those from young sham controls ( $n = 5$  per group). After linear models for microarray data analysis, the *P* values were adjusted for false discovery rate. Those with  $P < 0.1$  are listed. ER = endoplasmic reticulum; GTP = guanosine triphosphate; IL6 = interleukin 6; TNF = tumor necrosis factor.

mean arterial blood pressure and heart rate in the young and old IPC groups when compared with their respective control groups.

#### *Findings in Young and Old IPC Groups*

Thirty-one mRNA transcripts in the young animals subjected to IPC were increased (table 3), but no significant decrease in transcript levels were detected. The IPC-induced genes fell into functional classes: transcriptional regulators that normally respond to stress, cardiac protective cytokines and chemokines, inflammatory and

growth regulatory factors, genes associated with tissue remodeling and cell adhesion/migration, regulatory components of apoptosis pathways, and regulators of cell cycle and DNA repair. In contrast to the young group, IPC in the senescent animals resulted in up-regulation of only one myocardial mRNA transcript, the stress-induced transcriptional regulator Atf3.

#### *Findings in Young and Old APC Groups*

No significant gene expression changes were observed in the young and old rats after APC.

**Table 4. Real-time PCR Results Fold Change**

| Gene          | Normalized Gene Expression |              |             |             |             |             |
|---------------|----------------------------|--------------|-------------|-------------|-------------|-------------|
|               | YSC                        | YIPC         | YAPC        | OSC         | OIPC        | OAPC        |
| Atf3          | 1.47 ± 0.50                | 10.37 ± 2.11 | 1.19 ± 0.19 | 1.57 ± 0.59 | 7.08 ± 1.25 | 0.81 ± 0.15 |
| Egr1          | 1.37 ± 0.29                | 9.15 ± 3.10  | 1.75 ± 0.50 | —           | —           | —           |
| Interleukin 6 | 1.66 ± 0.43                | 4.11 ± 0.99  | 1.28 ± 0.59 | —           | —           | —           |
| Ccl2          | 1.60 ± 0.30                | 8.83 ± 2.53  | 1.20 ± 0.29 | —           | —           | —           |

Values are mean ± SEM.

APC = anesthetic preconditioning; IPC = ischemic preconditioning; O = old; PCR = polymerase chain reaction; SC = sham control; Y = young.

All data normalized to Pgk1 expression.

### Real-time RT-PCR

Target genes were selected (the four with the largest fold changes) and amplified from cDNA by real-time PCR (table 4). Results for the selected genes revealed an almost perfect concordance with the microarray data, hence confirming the accuracy of the gene chip results.

### Western Blotting Results

Previous work had shown that myocardial Egr1 protein levels are rapidly increased after IPC. Here, we show that the levels of Atf3 protein also increase markedly in young rat myocardium after early-phase IPC, in parallel with the increase in Atf3 mRNA (fig. 2).

### Network Analysis of Young IPC Modulated Genes

The relations among the IPC up-modulated genes were analyzed using the IPA software. The rank of the net-

work was based on the number of modulated (DE) genes populating each network (focus genes) and their degrees of connectivity compared with random samplings across the global network gene set. Two networks (1 and 2) achieved remarkably high *p* scores of 41 and 23, respectively, and accounted for 28 of 31 DE genes (figs. 3 and 4); all others contained less than 3 and had *p* scores ≤ 4. Networks 1 and 2 were immediately recognized as containing cardioprotective, cytokine-chemokine signaling pathways. Many of the intracellular pathways obtained in network 2 have been previously implicated in transducing the acute cardioprotective effects of IPC (see Discussion).

In network 1 (fig. 3), platelet-derived growth factor and interleukin (IL) 1 engage Nfκb-dependent pathways and impinge on various stress-activated transcriptional regulators, particularly Atf3. These may trigger enhanced expres-

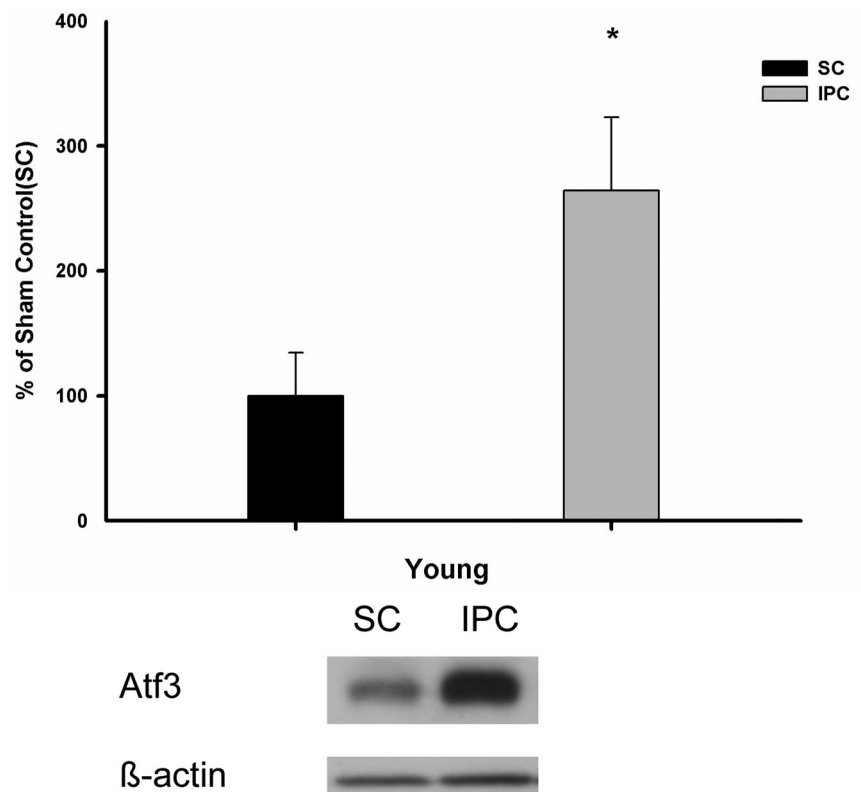

**Fig. 2. Representative Western blots of activating transcription factor 3 (Atf3) in the young sham control (SC) and young ischemic preconditioning (IPC) groups. Data are normalized to β-actin and expressed as mean ± SEM. \* *P* < 0.05 compared with young SC.**

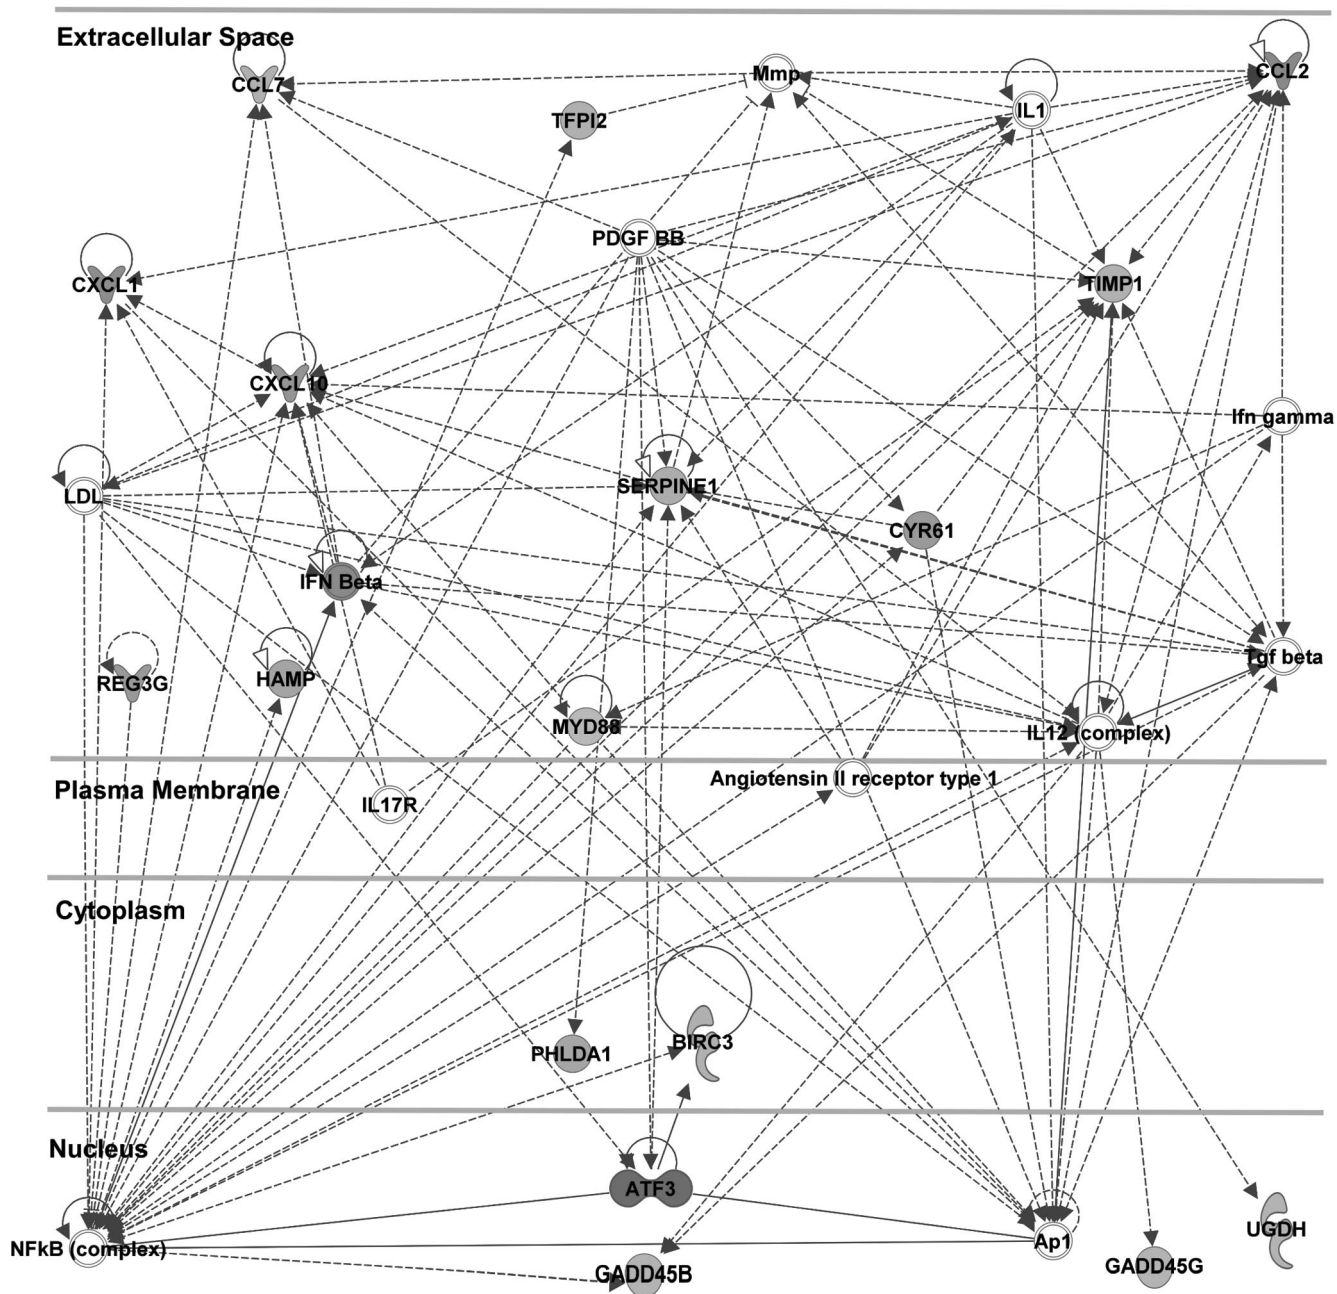

Fig. 3. Network 1 is a cytokine–chemokine signaling network identified by analysis of the relations among the young ischemic preconditioning up-modulated genes using Ingenuity Pathway Analysis (IPA) software (Ingenuity Systems, Mountain View, CA). In this network, the genes form nodes with connections (gene relationships). The intensity of the node shading indicates the degree of up-regulation; genes in *unshaded* nodes were not identified as differentially expressed in our experiment, but were integrated into the nascent computationally generated network on the basis of the evidence stored in the IPA knowledge base indicating a relevance to this network. *Solid line* = direct interaction; *dotted line* = indirect interaction. A *solid arrow* indicates positive or stimulatory interaction, whereas a *line terminating with a perpendicular* indicates an inhibitory interaction. The cell compartments are indicated. These network contained 17 of 31 differentially expressed young ischemic preconditioning gene sets (table 3) and obtained a *p* score of 43. Alkaline phosphatase, laminin, fibrinogen, and collagen (none focus genes) and their network interactions were removed for clarity.

sion of a network of chemokines, Cxcl1, Cxcl10, Ccl2, and Ccl7, known to affect cardiac injury response.<sup>20</sup> In network 2, CSF1, known to regulate cardiac remodeling after injury,<sup>21</sup> and IL6 related to late preconditioning<sup>22</sup> form hubs that are highly connected through PI3 kinase, rat sarcoma, protein kinase B, signal transducers and activators of transcription, mitogen-activated protein kinase, c-Jun N-termi-

nal kinase, p38MAPK, and ERK protein kinase pathways to transcriptional regulators Egr1 and 2, Zfp36, and Bgt2 (fig. 4).

## Discussion

Aging is associated with reduced functional reserve and altered responsiveness of the heart to ischemia

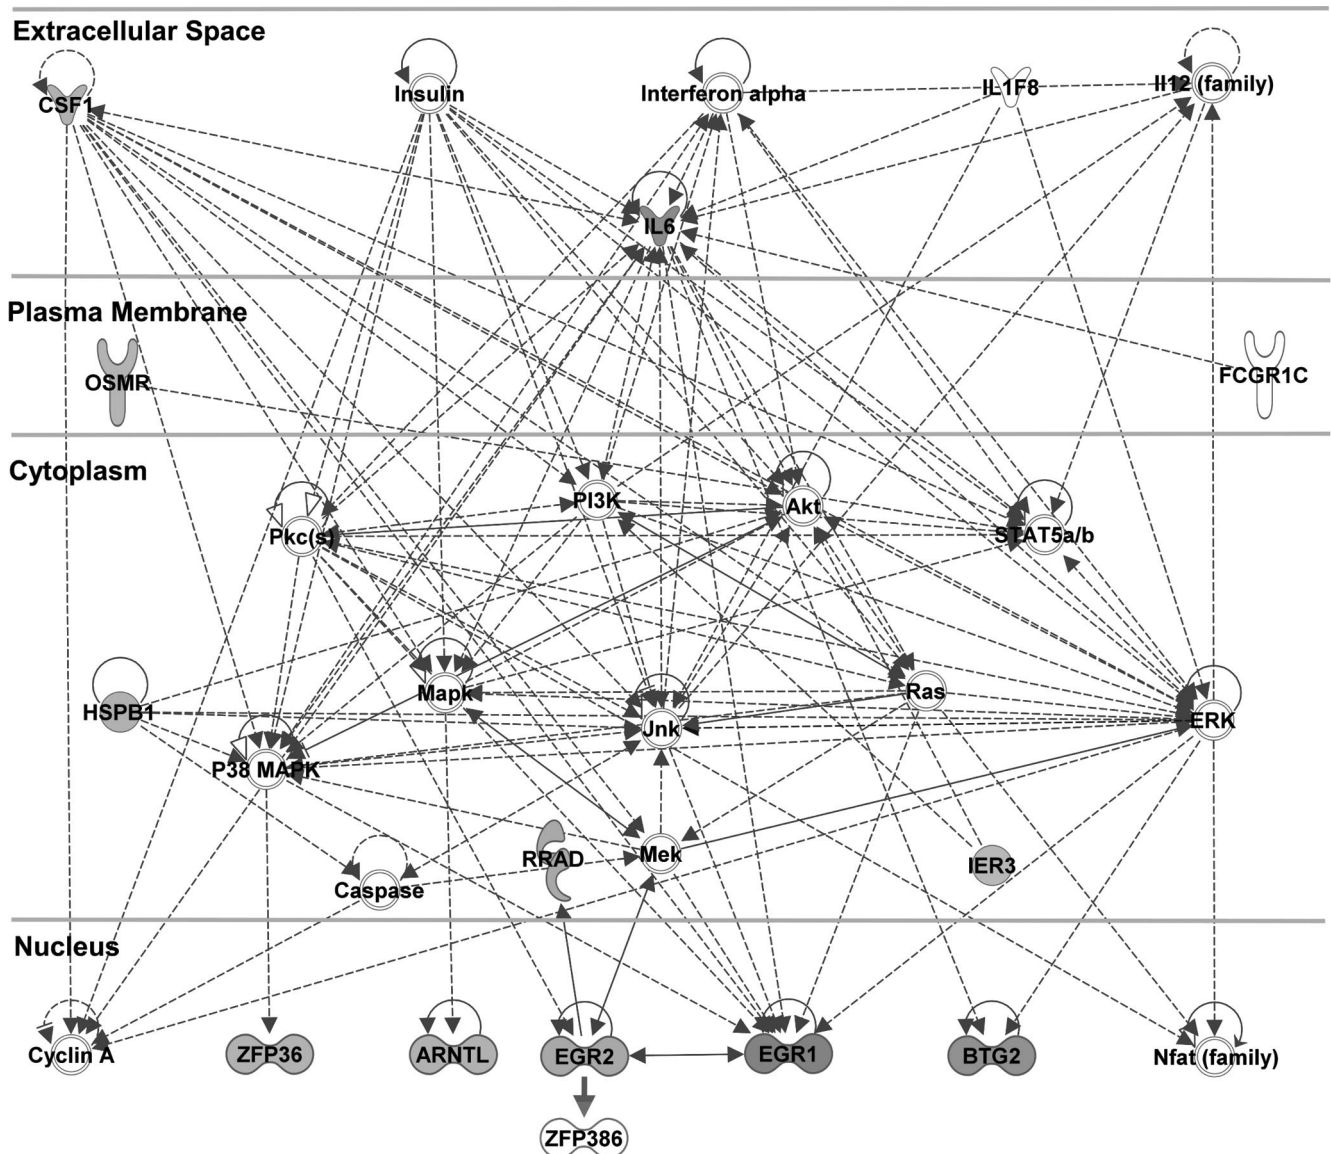

Fig. 4. Network 2 was identified and constructed as described for network 1 (fig. 3). Here, interleukin 6 and CSF1 have central roles. This network accounted for 11 of 31 differentially expressed young ischemic preconditioning gene sets (table 3) and obtained a  $p$  score of 23. FSH, IgG, hCG, and FcGR1c (none focus genes) and their network interactions were removed for clarity.

reperfusion injury, but the molecular basis for this deficiency has not been elucidated.<sup>23</sup> Here, we focused on preconditioning and the differentially affected gene expression patterns in young compared with senescent myocardium during early IPC and APC *in vivo*. Our most important findings are as follows. First, two types of early-phase preconditioning (IPC and APC) induced different genomic responses in that no evidence could be found that early-phase APC modulates gene expression in either age group; therefore, there was no support for the idea of a common expression set of early preconditioning genes. Second, this lack of any significant APC-induced change in gene expression raises the possibility that early-phase APC is caused mainly by a posttranscriptional or post-

translational mechanism. Third, and in contrast to APC, early-phase IPC in the young rat heart stimulates expression of immediate response genes and cytokines and chemokines, almost all of which have been shown to confer protection from ischemic injury. Fourth, the absence of any induced changes in the senescent myocardium (except for Atf3) could underlie the failure of IPC to provide any cardiac protective benefit in the older animal.

Previous studies have shown that brief periods of ischemia-reperfusion rapidly induce the adherence of blood components to the coronary vasculature.<sup>24</sup> Although it is possible that changes in IPC-induced transcript levels in adherent neutrophils and macrophages within the myocardial vasculature could contribute to changes in correspond-



ing mRNAs extracted from heart, this would represent a tiny fraction of the total RNA extracted from the ventricle and so is unlikely to be significant.

#### *Gene Expression Patterns in Young Myocardium during IPC*

Our results differ significantly from those obtained in an *ex vivo* model of IPC and APC in the young rat myocardium. In this previous work (da Silva *et al.*<sup>25</sup>), numerous transcripts were modulated by either IPC or APC. Predominantly up-regulated in APC and IPC at 180 min were cell surface receptors, ion channels, Gadd45 $\alpha$ , nitric oxide synthase 2, and mitogen-activated kinase kinase 2. In addition, APC up-modulated mitochondrial-related gene and B-cell translocation gene 1 (Btg1) and chemokine ligand 10, whereas both APC and IPC trigger protocols down-regulated Egr1 in this earlier study. The two major differences between the present work and this previous study are the use of an *ex vivo* Langendorff heart preparation and the longer time interval between application of the preconditioning stimulus and harvesting of the tissue for analysis (90 *vs.* 180 min) in the latter study. This latter difference could explain the down-modulation of the Egr1 transcript, because it is well known that growth- or stress-induced early increases in Egr1 mRNA levels are normally followed by suppression at later time points.<sup>26</sup> Most importantly, the normal inflammatory response to the IPC stimulus was profoundly and consistently down-regulated in the previous work. As originally noted by the authors, the Langendorff perfused heart model is virtually devoid of blood components and lacks the appropriate physiologic feedback between these blood components and the stimulated myocardium, which could provide a further explanation of the differences. Additional contrasts to our *in vivo* preparation include preservation of neurohumoral responses, and other homeostatic feedback mechanisms that would not be present in the *ex vivo* model.

It has previously been reported<sup>27</sup> that brief episodes of ischemia activate a cardioprotective genetic program in the rat heart. In this previous microarray study, it was shown that 20 min of ischemia followed by 4 h of reperfusion *in vivo* led to significant up-regulation of mRNA transcripts for heat shock proteins 70, 27, and 105, as well as 86 and 40KDa, vascular endothelial growth factor, brain-derived neurotrophic factor, plasminogen activator inhibitor 1, Atf3, Egr1, Btg2, and Gadd45 $\alpha$  compared with the normal myocardium. Whereas some of these results more closely paralleled our findings in the young IPC treated animals, no changes in cytokine IL6 or chemokine levels were reported, suggesting that these inflammatory factors were elaborated earlier in the response.

In our study, IPC triggered significant increases in Atf3, Egr1, Egr2, Btg2, Gadd45b, and Gadd45g mRNAs in the young myocardium. Atf3, a transcription factor also

known as liver regenerating factor, has been suggested to play an important role in growth regulation by controlling the expression of a delayed gene.<sup>28</sup> It is typically up-modulated during ischemia and various other stress conditions. Our study is consistent with a facilitating protective role for Atf3 in the response of myocardial tissue to ischemia-reperfusion. This transcription factor has a key function in network 1 (fig. 3), a chemokine cascade that engages Atf3 through Nfkb and Ap1. In network 1, Gadd45b and Gadd45g are also stress-induced regulators that are thought to be controlled by Nfkb-dependent pathways and are implicated in DNA repair and cell cycle control,<sup>29</sup> with possible links to the generation of reactive oxygen species as occurs during IPC.<sup>11</sup> Timp1 is a natural inhibitor of the matrix metalloproteinases, whereas Serpine1, also known as plasminogen activator inhibitor 1, retards the degradation of fibrin contributing to thrombus accretion.<sup>30</sup> Serpine1 is up-regulated by Hif1 and Egr1.<sup>31</sup> CYR61 expression is also stimulated by oxidative stress<sup>32</sup> and transcriptional regulators Egr1, Hif1, and cJun/Ap1.<sup>33,34</sup> It facilitates endothelial cell adhesion through interactions with integrins and promotes neovascularization.<sup>33,34</sup> Birc3, a Ring-containing protein ubiquitin ligase that can be up-modulated by cytokines,<sup>35</sup> suppresses apoptosis, at least in part, by inhibiting caspase activation.<sup>36</sup>

Network 2 predicts that Egr1 and 2 operate downstream of IL6 and CSF1 through intracellular pathways previously implicated in preconditioning responses. Egr1 and 2 are immediate-early gene zinc finger transcription factors<sup>25</sup> that broadly activate transcripts of other transcriptional control factors and other regulators. These, in turn, activate transcription of a host of growth and stress response pathway genes. Btg2 has been found to be induced by genotoxic and oxidative stress<sup>37</sup> and ischemic preconditioning.<sup>26</sup>

In our study, IPC of the young myocardium caused a significant up-regulation of chemokines Cxcl10, Ccl2 (monocyte chemoattractant protein 1), Cxcl1, Cc7, and cytokine IL6. Understanding of the role of chemokines and cytokines in IPC may result in novel strategies for treatment of patients with ischemic heart disease. Previous work has shown that these inflammatory modulators are actually expressed in the myocardium after ischemic injury.<sup>38,39</sup> Recent studies have also reported that chemokine expression is markedly up-regulated in healing myocardial infarcts and may play an important role in regulating leukocyte infiltration and activity and modulating infarct angiogenesis as well as fibrous tissue deposition.<sup>20</sup> Monocyte chemoattractant protein 1 is involved in the pathophysiology of ischemic heart disease.<sup>40</sup> Cardiac monocyte chemoattractant protein 1 overexpression also prevents superoxide generation in the heart subjected to ischemia-reperfusion injury.<sup>41</sup> Ccl2 also has been shown to increase IL6 secretion in cardiomyocytes,

and both have been found to act synergistically to increase Stat3 activity.<sup>42</sup>

IL6 is a proinflammatory cytokine that is a prognostic marker associated with left ventricular contractile dysfunction and heart failure,<sup>43</sup> and cardiomyocytes themselves have been shown to produce IL6 in response to hypoxia<sup>44</sup> and ischemia-reperfusion.<sup>45</sup> On the other hand, IL6 is obligatory required for the activation of the Janus kinase/signal transducers and activators of transcription pathway, the ensuing up-regulation of inducible nitric oxide synthase and cyclooxygenase 2 (co-mediators of late-phase preconditioning),<sup>46</sup> and the development of a cardioprotective phenotype.<sup>22</sup> IL6 confers protection on cardiomyocytes from simulated ischemia/reperfusion injury and this effect depends on PI-3 kinase and iNOS pathways.<sup>47</sup>

#### *Age-associated Alterations in Early-phase IPC*

Previous studies have shown that aging is associated with significant alterations in the expression patterns of cell surface cytokine receptors, thus suggesting a potential mechanism that may contribute to senescent changes in cardiac microvasculature activity.<sup>48</sup> Our study shows that in myocardium from the older animals, no transcript levels were altered, with the exception of Atf3. This increase in Atf3 was relatively small and might be not sufficient to engage the other pathways that elicit cardiac protection. The only previous study of age-related changes of cardiac gene expression was conducted with brief episodes of ischemia-reperfusion followed by 24 h of recovery.<sup>12</sup> This work showed that down-regulation of transcripts was associated with early-remodeling genes in the young rat as well as decreases in hypertrophy-related transcripts, whereas hearts from old animals showed a unique injury-related response, which included up-regulation of mRNAs encoding proteins associated with hypertrophy or apoptosis.

In a mouse model of myocardial infarction, Frangogiannis *et al.*<sup>20</sup> showed that myocardial senescence was associated with decreased and delayed neutrophil and macrophage infiltration, markedly reduced cytokine and chemokine expression, and impaired phagocytosis of dead cardiomyocytes. Delayed granulation tissue formation and markedly reduced collagen deposition were also observed.<sup>20</sup> These defects might contribute to adverse remodeling after ischemia-reperfusion injury in the old animals.

Our finding that early-phase preconditioning elicits little change in the patterns of gene expression in the hearts of older animals is consistent with the ineffectiveness of IPC and APC in protecting the senescent myocardium. Here, the lack of increased cytokine and chemokines may be crucial. Understanding of the molecular mechanisms underlying these changes may provide in-

sights into myocardial aging and lead to potentially new therapeutic strategies.

#### *Gene Expression Patterns in Young and Old Myocardium during APC*

The inability of APC to induce acute changes in gene expression also leads to the obvious conclusion that a common set of early-phase preconditioning-induced genes could not be identified and so to the rejection of our second hypothesis. This failure to find a common preconditioning gene set was not due to an overly stringent application of FDR control, because allowing for a more generous 20% FDR still did not show any potential genes in common between IPC and APC.

We had shown previously that isoflurane induced cardiac protection through increases in reactive oxygen species in the young but not senescent rat myocardium. Here, we have extended these findings and have shown that early-phase APC is independent of modulation of gene transcript levels. Unlike IPC, APC did not significantly alter myocardial gene expression in young or old animals. Because only IPC alters substantially changes gene expression, the idea that acutely modulating gene expression is necessary for early-phase APC and its consequent cardiac protection must be rejected.

Nonetheless, previous work has established that both early-phase IPC and APC engage a number of signaling pathways that involve protein phosphorylation cascades. These include PI3K-Akt, MEK-1/2-ERK1/2, NF $\kappa$ B, and PKC pathways, and pharmacologic evidence demonstrates that these pathways are essential for IPC and APC-induced cardioprotection.<sup>49</sup> A number of studies have demonstrated that protein kinases, such as Akt/GSK3 $\beta$ , mitogen-activated protein kinases, and PKC isoforms, are activated by APC, leading to the Ser/Thr phosphorylation of numerous substrates involved in regulating prosurvival pathways, including the mitochondrial transition pore currently believed to be a central element in the preconditioning pathway.<sup>50,51</sup>

Our network analyses of the IPC-induced changes in transcript levels suggest that these various phosphorylation pathways may mediate the changes in gene expression that we observe, yet engagement of these pathways seems to be insufficient to trigger, acutely, a comparable APC-induced genomic response. Whether these or other pathways are indeed responsible for the observed changes in gene expression and whether these changes are necessary or sufficient for IPC-related cardiac protection remain to be examined.

#### *Clinical Implications*

There is a large amount of experimental evidence that IPC and APC exert beneficial effects on the consequences of myocardial ischemia-reperfusion injury.

Recent research has been focused on the possible implementation of this property in patient care. Age dependence of preconditioning response is highly relevant to clinical utility, because the majority of patients to benefit from adjunctive cardioprotection are in the older age range. Several studies have addressed the potential clinical implication of cardioprotection by volatile anesthetics in patients undergoing coronary artery surgery, looking at cellular enzyme release and myocardial function.<sup>52-55</sup>

Because of obvious limitations, it has been difficult in the past to provide sufficient evidence for anesthetic preconditioning in clinical studies. A few clinical studies with a small number of patients have been conducted, with somewhat limited success. The beneficial effects of volatile anesthetics in elderly high-risk patients undergoing elective coronary artery bypass grafting have so far been confined to surrogate markers. In the first study, by Belhomme *et al.*,<sup>56</sup> in patients aged  $70 \pm 9$  yr undergoing elective coronary artery bypass grafting, anesthetic preconditioning was elicited after the onset of cardiopulmonary bypass by a 5-min exposure to 2.5 minimum alveolar concentration isoflurane, followed by a 10-min washout before aortic cross clamping and cardioplegic arrest. Van Der Linden *et al.*<sup>57</sup> investigated the effects of several anesthetics on recovery of myocardial function in coronary surgery patients older than 70 yr with three vessel disease and an ejection fraction less than 50%. The volatile anesthetics sevoflurane and desflurane preserved left ventricular function after surgery with less evidence of myocardial damage postoperatively. Although these results suggest a beneficial effect of cardioprotection and preconditioning by volatile anesthetics in elderly patients with coronary artery disease, no clinical investigation to date has shown decreased long-term morbidity and mortality by anesthetic preconditioning.

Not all clinical preconditioning studies, however, have shown cardioprotective effects in terms of either better preservation of myocardial function or less postoperative myocardial damage.<sup>58,59</sup> This underscores the fact that the clinical preconditioning protocol, patient age, and disease condition may be critical to its putative protective effects.

#### Study Limitations

This study focused on the transcriptional profiling of the young and senescent myocardium during early-phase IPC and APC using a microarray approach. Confirmation using RT-PCR was performed with only a limited number of genes; nonetheless, DNA microarray platforms have been shown to exhibit high correlation with quantitative gene expression values, as determined by RT-PCR assays. The inferences drawn from these data are subject to the caveat that functionally important changes in protein expression and/or posttranslational modification during

early-phase IPC and APC are unknown, with the exception of Atf3 and Egr1. Although genomics has demonstrated that there is more than 85% similarity in coding regions of the rat genome compared with the human genome, data from rodent studies must always be interpreted with caution with respect to therapeutic or pathophysiologic implications for human patients. Another possible limitation of our study is that the same dose of isoflurane was used in both age groups, and minimum alveolar concentration values decline with age. Only a single time point was chosen, so our experiments could miss some important later gene expression changes. Indeed, previous work would indicate that lengthening the time interval would reveal some changes induced by APC. However, we chose the most relevant time interval corresponding to the earliest phase of APC-induced cardiac protection. It is likely that in the young animals subjected to IPC, transcription of some genes was also suppressed. Because our study only measured the steady state levels of mRNA, significant effects to suppress transcription may have been obscured by the requirement that the preexisting pools of these putative mRNAs be degraded during a relatively brief time interval. Finally, we ascribe the changes in gene expression to the myocardium, implying a specific association with the cardiomyocytes, but the myocardium is a more complex tissue with fibroblasts, modified myocytes involved in electrical conduction pathways, and numerous vascular elements, including adherence of blood components. Further studies localizing the IPC-induced transcriptional changes to specific cell types would help to clarify these relationships. Our new findings raise the possibility that IPC-related gene expression actually triggers cytokine and chemokine induced pro-survival pathways in the young heart, although such a mechanism seems to be absent in the old tissue. Experiments have yet to be performed to test whether these early IPC-induced changes in gene expression are causally linked to cardiac protection in the young myocardium. Whether the senescent myocardium could respond in a salutary manner to an appropriate combination of these inflammatory factors is also unknown.

In conclusion, the current study provides the first gene expression profile associated with early-phase IPC and APC in the young compared with the senescent myocardium *in vivo*. The attenuation of IPC and APC in the aged myocardium may be attributed to multiple factors. Here, we showed that a defect in IPC-induced transcriptional gene expression might be one underlying reason for the absence of cardiac protection in the aged myocardium. These results lay the groundwork for future studies aimed at determining whether and how these genomic alterations affect cardiac phenotype and function.

## References

1. Wei JY: Age and the cardiovascular system. *N Engl J Med* 1992; 327:1735-9
2. Lakatta EG: Research agenda for cardiovascular aging: Humans to molecules. *Am J Geriatr Cardiol* 2000; 9:251-62
3. Pollack JA, Skvorak JP, Nazian SJ, Landon CS, Dietz JR: Alterations in atrial natriuretic peptide (ANP) secretion and renal effects in aging. *J Gerontol A Biol Sci Med Sci* 1997; 52:B196-202
4. Abete P, Cioppa A, Calabrese C, Pascucci I, Cacciatore F, Napoli C, Carnovale V, Ferrara N, Rengo F: Ischemic threshold and myocardial stunning in the aging heart. *Exp Gerontol* 1999; 34:875-84
5. Murry CE, Jennings RB, Reimer KA: Preconditioning with ischemia: A delay of lethal cell injury in ischemic myocardium. *Circulation* 1986; 74:1124-36
6. Kersten JR, Schmeling TJ, Pagel PS, Gross GJ, Warltier DC: Isoflurane mimics ischemic preconditioning *via* activation of K(ATP) channels: Reduction of myocardial infarct size with an acute memory phase. *ANESTHESIOLOGY* 1997; 87:361-70
7. Murry CE, Richard VJ, Jennings RB, Reimer KA: Myocardial protection is lost before contractile function recovers from ischemic preconditioning. *Am J Physiol* 1991; 260:H796-804
8. Sack S, Mohri M, Arras M, Schwarz ER, Schaper W: Ischaemic preconditioning-time course of renewal in the pig. *Cardiovasc Res* 1993; 27:551-5
9. Kuzuya T, Hoshida S, Yamashita N, Fujii H, Oe H, Hori M, Kamada T, Tada M: Delayed effects of sublethal ischemia on the acquisition of tolerance to ischemia. *Circ Res* 1993; 72:1293-9
10. McCully JD, Toyoda Y, Wakiyama H, Rousou AJ, Parker RA, Levitsky S: Age- and gender-related differences in ischemia/reperfusion injury and cardioprotection: Effects of diazoxide. *Ann Thorac Surg* 2006; 82:117-23
11. Nguyen LT, Rebecchi MJ, Moore LC, Glass PS, Brink PR, Liu L: Attenuation of isoflurane-induced preconditioning and reactive oxygen species production in the senescent rat heart. *Anesth Analg* 2008; 107:776-82
12. Simkhovich BZ, Marjoram P, Poizat C, Kedes L, Kloner RA: Age-related changes of cardiac gene expression following myocardial ischemia/reperfusion. *Arch Biochem Biophys* 2003; 420:268-78
13. Gentleman RC, Carey VJ, Bates DM, Bolstad B, Dettling M, Dudoit S, Ellis B, Gautier L, Ge Y, Gentry J, Hornik K, Hothorn T, Huber W, Iacus S, Irizarry R, Leisch F, Li C, Maechler M, Rossini AJ, Sawitzki G, Smith C, Smyth G, Tierney L, Yang JY, Zhang J: Bioconductor: Open software development for computational biology and bioinformatics. *Genome Biol* 2004; 5:R80
14. Irizarry RA, Hobbs B, Collin F, Beazer-Barclay YD, Antonellis KJ, Scherf U, Speed TP: Exploration, normalization, and summaries of high density oligonucleotide array probe level data. *Biostatistics* 2003; 4:249-64
15. Smyth GK: Linear models and empirical Bayes methods for assessing differential expression in microarray experiments. *Stat Appl Genet Mol Biol* 2004; 3:article 3
16. Livak KJ, Schmittgen TD: Analysis of relative gene expression data using real-time quantitative PCR and the 2(-Delta Delta C(T)) method. *Methods* 2001; 25:402-8
17. Benjamini Y, Hochberg Y: Controlling the false discovery rate: A practical and powerful approach to multiple testing. *J R Stat Soc Series B Stat Methodol* 1995; 57:289-300
18. Rampil IJ, Moller DH, Bell AH: Isoflurane modulates genomic expression in rat amygdala. *Anesth Analg* 2006; 102:1431-8
19. Lee ML, Whitmore GA: Power and sample size for DNA microarray studies. *Stat Med* 2002; 21:3543-70
20. Frangogiannis NG, Entman ML: Chemokines in myocardial ischemia. *Trends Cardiovasc Med* 2005; 15:163-9
21. Okada H, Takemura G, Kosai K, Tsujimoto A, Esaki M, Takahashi T, Nagano S, Kanamori H, Miyata S, Li Y, Ohno T, Maruyama R, Ogino A, Li L, Nakagawa M, Nagashima K, Fujiwara T, Fujiwara H, Minatoguchi S: Combined therapy with cardioprotective cytokine administration and antiapoptotic gene transfer in postinfarction heart failure. *Am J Physiol Heart Circ Physiol* 2009; 296:H616-26
22. Dawn B, Xuan YT, Guo Y, Rezazadeh A, Stein AB, Hunt G, Wu WJ, Tan W, Bolli R: IL-6 plays an obligatory role in late preconditioning *via* JAK-STAT signaling and upregulation of iNOS and COX-2. *Cardiovasc Res* 2004; 64:61-71
23. Preston CC, Oberlin AS, Holmuhamedov EL, Gupta A, Sagar S, Syed RH, Siddiqui SA, Raghavakaimal S, Terzic A, Jahangir A: Aging-induced alterations in gene transcripts and functional activity of mitochondrial oxidative phosphorylation complexes in the heart. *Mech Ageing Dev* 2008; 129:304-12
24. Sbrana S, Bevilacqua S, Buffa M, Spiller D, Parri MS, Gianetti J, De Filippis R, Clerico A: Post-reperfusion changes of monocyte function in coronary blood after extracorporeal circulation. *Cytometry B Clin Cytom* 2005; 65:14-21
25. da Silva R, Lucchinetti E, Pasch T, Schaub MC, Zaugg M: Ischemic but not pharmacological preconditioning elicits a gene expression profile similar to unprotected myocardium. *Physiol Genomics* 2004; 20:117-30
26. Carmel JB, Kakinohana O, Mestral R, Young W, Marsala M, Hart RP: Mediators of ischemic preconditioning identified by microarray analysis of rat spinal cord. *Exp Neurol* 2004; 185:81-96
27. Simkhovich BZ, Marjoram P, Poizat C, Kedes L, Kloner RA: Brief episode of ischemia activates protective genetic program in rat heart: A gene chip study. *Cardiovasc Res* 2003; 59:450-9
28. Hsu JC, Bravo R, Taub R: Interactions among LRF-1, JunB, c-Jun, and c-Fos define a regulatory program in the G1 phase of liver regeneration. *Mol Cell Biol* 1992; 12:4654-65
29. Zhang N, Ahsan MH, Zhu L, Sambucetti LC, Pardo AF, West DB: NF- $\kappa$ B and not the MAPK signaling pathway regulates GADD45 $\beta$  expression during acute inflammation. *J Biol Chem* 2005; 280:21400-8
30. Felkin LE, Birks EJ, George R, Wong S, Khaghani A, Yacoub MH, Barton PJ: A quantitative gene expression profile of matrix metalloproteinases (MMPs) and their inhibitors (TIMPs) in the myocardium of patients with deteriorating heart failure requiring left ventricular assist device support. *J Heart Lung Transplant* 2006; 25:1413-9
31. Liao H, Hyman MC, Lawrence DA, Pinsky DJ: Molecular regulation of the PAI-1 gene by hypoxia: Contributions of Egr-1, HIF-1 $\alpha$ , and C/EBP $\alpha$ . *FASEB J* 2007; 21:935-49
32. Yoshida Y, Togi K, Matsumae H, Nakashima Y, Kojima Y, Yamamoto H, Ono K, Nakamura T, Kita T, Tanaka M: CCN1 protects cardiac myocytes from oxidative stress *via*  $\beta$ 1 integrin-Akt pathway. *Biochem Biophys Res Commun* 2007; 355:611-8
33. Grote K, Bavendiek U, Grothusen C, Flach I, Hilfiker-Kleiner D, Drexler H, Schieffer B: Stretch-inducible expression of the angiogenic factor CCN1 in vascular smooth muscle cells is mediated by Egr-1. *J Biol Chem* 2004; 279:55675-81
34. Kunz M, Moeller S, Koczan D, Lorenz P, Wenger RH, Glocker MO, Thiesen HJ, Gross G, Ibrahim SM: Mechanisms of hypoxic gene regulation of angiogenesis factor Cyr61 in melanoma cells. *J Biol Chem* 2003; 278:45651-60
35. Sarkar SA, Kutlu B, Velmurugan K, Kizaka-Kondoh S, Lee CE, Wong R, Valentine A, Davidson HW, Hutton JC, Pugazhenth S: Cytokine-mediated induction of anti-apoptotic genes that are linked to nuclear factor kappa-B (NF- $\kappa$ B) signalling in human islets and in a mouse beta cell line. *Diabetologia* 2009; 52:1092-101
36. Wootz H, Hansson I, Korhonen L, Lindholm D: XIAP decreases caspase-12 cleavage and calpain activity in spinal cord of ALS transgenic mice. *Exp Cell Res* 2006; 312:1890-8
37. Dandrea T, Hellmold H, Jonsson C, Zhivotovsky B, Hofer T, Warngard L, Cotgreave I: The transcriptosomal response of human A549 lung cells to a hydrogen peroxide-generating system: Relationship to DNA damage, cell cycle arrest, and caspase activation. *Free Radic Biol Med* 2004; 36:881-96
38. Frangogiannis NG: Chemokines in the ischemic myocardium: From inflammation to fibrosis. *Inflamm Res* 2004; 53:585-95
39. Frangogiannis NG, Smith CW, Entman ML: The inflammatory response in myocardial infarction. *Cardiovasc Res* 2002; 53:31-47
40. Hayashidani S, Tsutsui H, Shiomi T, Ikeuchi M, Matsusaka H, Suematsu N, Wen J, Egashira K, Takeshita A: Anti-monocyte chemoattractant protein-1 gene therapy attenuates left ventricular remodeling and failure after experimental myocardial infarction. *Circulation* 2003; 108:2134-40
41. Bujak M, Kweon HJ, Chatila K, Li N, Taffet G, Frangogiannis NG: Aging-related defects are associated with adverse cardiac remodeling in a mouse model of reperfused myocardial infarction. *J Am Coll Cardiol* 2008; 51:1384-92
42. Morimoto H, Takahashi M, Izawa A, Ise H, Hongo M, Kolattukudy PE, Ikeda U: Cardiac overexpression of monocyte chemoattractant protein-1 in transgenic mice prevents cardiac dysfunction and remodeling after myocardial infarction. *Circ Res* 2006; 99:891-9
43. Tsutamoto T, Hisanaga T, Wada A, Maeda K, Ohnishi M, Fukui D, Mabuchi N, Sawaki M, Kinoshita M: Interleukin-6 spillover in the peripheral circulation increases with the severity of heart failure, and the high plasma level of interleukin-6 is an important prognostic predictor in patients with congestive heart failure. *J Am Coll Cardiol* 1998; 31:391-8
44. Gwechenberger M, Mendoza LH, Youker KA, Frangogiannis NG, Smith CW, Michael LH, Entman ML: Cardiac myocytes produce interleukin-6 in culture and in viable border zone of reperfused infarctions. *Circulation* 1999; 99:546-51
45. Yamauchi-Takahara K, Ihara Y, Ogata A, Yoshizaki K, Azuma J, Kishimoto T: Hypoxic stress induces cardiac myocyte-derived interleukin-6. *Circulation* 1995; 91:1520-4
46. Xuan YT, Guo Y, Han H, Zhu Y, Bolli R: An essential role of the JAK-STAT pathway in ischemic preconditioning. *Proc Natl Acad Sci U S A* 2001; 98:9050-5
47. Smart N, Mojte MH, Latchman DS, Marber MS, Duchon MR, Heads RJ: IL-6 induces PI 3-kinase and nitric oxide-dependent protection and preserves mitochondrial function in cardiomyocytes. *Cardiovasc Res* 2006; 69:164-77
48. Cai D, Xaymardan M, Holm JM, Zheng J, Kizer JR, Edelberg JM: Age-associated impairment in TNF- $\alpha$  cardioprotection from myocardial infarction. *Am J Physiol Heart Circ Physiol* 2003; 285:H463-9
49. Hausenloy DJ, Tsang A, Mocanu MM, Yellon DM: Ischemic preconditioning protects by activating prosurvival kinases at reperfusion. *Am J Physiol Heart Circ Physiol* 2005; 288:H971-6
50. Raphael J, Rivo J, Gozal Y: Isoflurane-induced myocardial preconditioning is dependent on phosphatidylinositol-3-kinase/Akt signalling. *Br J Anaesth* 2005; 95:756-63
51. Ludwig LM, Wehrauch D, Kersten JR, Pagel PS, Warltier DC: Protein kinase C translocation and Src protein tyrosine kinase activation mediate isoflurane-induced preconditioning *in vivo*: Potential downstream targets of mitochondrial adenosine triphosphate-sensitive potassium channels and reactive oxygen species. *ANESTHESIOLOGY* 2004; 100:532-9
52. Guarracino F, Landoni G, Tritapepe L, Pompei F, Leoni A, Aletti G, Scandroglio AM, Maselli D, De Luca M, Marchetti C, Crescenzi G, Zangrillo A: Myocardial damage prevented by volatile anesthetics: A multicenter randomized controlled study. *J Cardiothorac Vasc Anesth* 2006; 20:477-83

53. Tritapepe L, Landoni G, Guarracino F, Pompei F, Crivellari M, Maselli D, De Luca M, Fochi O, D'Avolio S, Bignami E, Calabro MG, Zangrillo A: Cardiac protection by volatile anaesthetics: A multicentre randomized controlled study in patients undergoing coronary artery bypass grafting with cardiopulmonary bypass. *Eur J Anaesthesiol* 2007; 24:323-31

54. Julier K, da Silva R, Garcia C, Bestmann L, Frascarolo P, Zollinger A, Chassot PG, Schmid ER, Turina MI, von Segesser LK, Pasch T, Spahn DR, Zaugg M: Preconditioning by sevoflurane decreases biochemical markers for myocardial and renal dysfunction in coronary artery bypass graft surgery: A double-blinded, placebo-controlled, multicenter study. *ANESTHESIOLOGY* 2003; 98:1315-27

55. Pouzet B, Lecharny JB, Dehoux M, Paquin S, Kitakaze M, Mantz J, Menasche P: Is there a place for preconditioning during cardiac operations in humans? *Ann Thorac Surg* 2002; 73:843-8

56. Belhomme D, Peynet J, Louzy M, Launay JM, Kitakaze M, Menasche P: Evidence for preconditioning by isoflurane in coronary artery bypass graft surgery. *Circulation* 1999; 100:II340-4

57. Van Der Linden PJ, Daper A, Trenchant A, De Hert SG: Cardioprotective effects of volatile anesthetics in cardiac surgery. *ANESTHESIOLOGY* 2003; 99: 516-7

58. Fellahi JL, Gue X, Philippe E, Riou B, Gerard JL: Isoflurane may not influence postoperative cardiac troponin I release and clinical outcome in adult cardiac surgery. *Eur J Anaesthesiol* 2004; 21:688-93

59. Piriou V, Mantz J, Goldfarb G, Kitakaze M, Chiari P, Paquin S, Cornu C, Lecharny JB, Aussage P, Vicaud E, Pons A, Lehot JJ: Sevoflurane preconditioning at 1 MAC only provides limited protection in patients undergoing coronary artery bypass surgery: A randomized bi-centre trial. *Br J Anaesth* 2007; 99:624-31

## ANESTHESIOLOGY REFLECTIONS

### New Yorkers Foregger and Connell

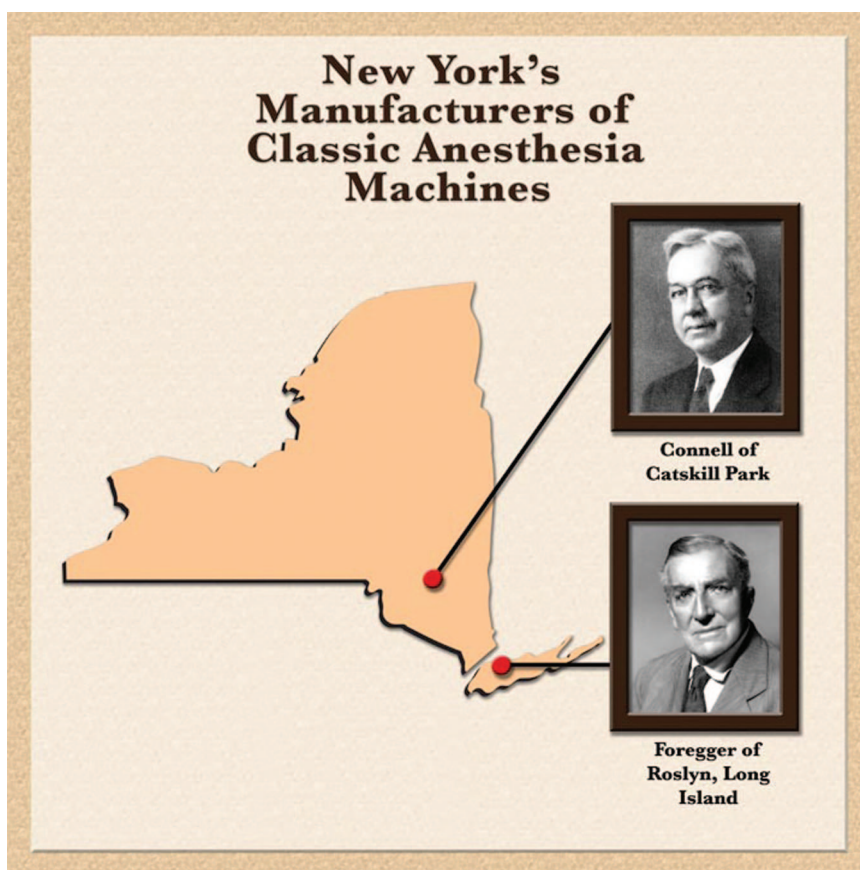

Born in Vienna, Austria, Richard von Foregger (1872–1960) earned his Ph.D. on the Continent before working with Carl Steinmetz in New York. After fusing sodium peroxide to generate oxygen, Foregger founded his namesake company in Roslyn, New York. Over the next 40 yr he assisted development of anesthetic apparatus such as the Gwathmey Apparatus, Waters' To-and-Fro Canister, and Morris' "Copper Kettle" precision vaporizer. Competing against Foregger was a Nebraskan-turned-New Yorker, Karl Connell, M.D. (1878–1941), who invented the Anesthetometer and developed at least three types of flowmeters for his finely calibrated Connell Anesthesia Machines. Both of these adopted sons of New York produced anesthetic apparatus and machines using suggestions supplied by practicing anesthesiologists. (Copyright © the American Society of Anesthesiologists, Inc. This image appears in color in the *Anesthesiology Reflections* online collection available at [www.anesthesiology.org](http://www.anesthesiology.org).)

*George S. Bause, M.D., M.P.H., Honorary Curator, ASA's Wood Library-Museum of Anesthesiology, Park Ridge, Illinois, and Clinical Associate Professor, Case Western Reserve University, Cleveland, Ohio. UJYC@aol.com.*
